# Supplementary material for: A missense variant in IFT122 associated with a canine model of retinitis pigmentosa
Source: Hum Genet. 2021 Feb 19;140(11):1569–79. doi: 10.1007/s00439-021-02266-3 (PMC8519925; doi:10.1007/s00439-021-02266-3)
Supplement: Supplementary file 3 — Supplementary file3 Online Resource 3 List of case-specific variants from the whole-genome sequenced affected LH (XLSX 16 KB) [file 439_2021_2266_MOESM3_ESM.xlsx]

## Sheet: SNV
Chromosome	Position bp	REF	ALT	Function Ensembl	Gene Ensembl	Exonic Function Ensembl	Amino Acid Change Ensembl	Function NCBI	Gene NCBI	Exonic Function NCBI	Amino Acid Change NCBI
chr20	86600	G	T	intronic	ALDH1L1			intronic	LOC476506
chr20	135427	G	C	intronic	SLC41A3			intronic	SLC41A3
chr20	208195	G	T	intronic	SLC41A3			intronic	SLC41A3
chr20	375039	T	TGAAAGGCTATATGAGAAAAAAAAAAAAAAAAAAAAAAAAAAAAAAAAAAAAAAAAAAAAA,TGAAAGGCTATATGAGAAAAAAAAAAAAAAAAAAAAAAAAAAAAAAAAAAAAAAAAA	intergenic	ENSCAFG00000003792-ENSCAFG00000013572			intronic	LOC100855730
chr20	599177	G	A	intronic	CFAP100			intronic	CFAP100
chr20	679786	CG	C	intronic	UROC1			intronic	UROC1
chr20	717696	G	A	upstream	UROC1			upstream	UROC1
chr20	746934	G	GCCCC	UTR3	ENSCAFG00000028530			UTR3	CHST13
chr20	939264	C	T	intronic	PLXNA1			ncRNA_intronic	LOC106560085
chr20	1002063	T	TC,TCC	intronic	PLXNA1			intronic	CHCHD6
chr20	1121660	T	A	intronic	PLXNA1			intergenic	CHCHD6-LOC102152377
chr20	1369662	C	T	intergenic	ENSCAFG00000049522-ENSCAFG00000042708			intergenic	LOC106560069-LOC111091424
chr20	1610058	G	C	intergenic	ENSCAFG00000042708-TPRA1			intergenic	LOC111091221-LOC102154894
chr20	1645598	G	A	intergenic	ENSCAFG00000042708-TPRA1			intergenic	LOC111091221-LOC102154894
chr20	2174016	T	A	intronic	EEFSEC			intronic	EEFSEC
chr20	2174017	C	A	intronic	EEFSEC			intronic	EEFSEC
chr20	2186371	G	A	intronic	EEFSEC			intronic	EEFSEC
chr20	2191635	T	A	intronic	EEFSEC			intronic	EEFSEC
chr20	2209230	G	A	intronic	EEFSEC			intronic	EEFSEC
chr20	2382008	C	G	intronic	EEFSEC			intronic	EEFSEC
chr20	2475701	G	GCC	intronic	GATA2			intronic	GATA2
chr20	2589996	G	A	intergenic	ENSCAFG00000004144-RPN1			intergenic	LOC102152718-RPN1
chr20	2789187	C	T	intronic	RAB7A			exonic	LOC111091356	Synonymous SNV	XM_022406864.1:c.717G>A:p.A239A
chr20	3076799	G	A	intronic	ACAD9-EFCC1			intronic	EFCC1
chr20	3288250	G	A	intronic	IQSEC1			intronic	IQSEC1
chr20	3367395	T	TTGGC	intronic	IQSEC1			intronic	IQSEC1
chr20	3367396	A	AT	intronic	IQSEC1			intronic	IQSEC1
chr20	3459083	C	A	intronic	IQSEC1			intergenic	IQSEC1-LOC111091225
chr20	3737819	T	TAAAATCAAGAAACAAAAAAAAAAAAAAAAAAAAAAAAAAAAAAAAAAAAAAAAAAAAAAA,TAAAATCAAGAAACAAAAAAAAAAAAAAAAAAAAA	intergenic	NUP210-HDAC11			intronic	NUP210
chr20	3792060	T	A	upstream	HDAC11			ncRNA_exonic	LOC100687984
chr20	3899119	G	A	intronic	FBLN2			intronic	FBLN2
chr20	4049444	C	T	ncRNA_intronic	ENSCAFG00000042609			ncRNA_intronic	LOC111091227
chr20	4098771	CATCT	C	intronic	WNT7A			intronic	WNT7A
chr20	4200645	G	T	intergenic	ENSCAFG00000046802-CHCHD4			downstream	LOC100683648
chr20	4201521	G	A	intergenic	ENSCAFG00000046802-CHCHD4			intergenic	LOC100683648-CHCHD4
chr20	4333501	GCC	G	intronic	LSM3			intronic	LSM3
chr20	4368539	G	A	intergenic	LSM3-ENSCAFG00000037118			intergenic	LSM3-LOC102152894
chr20	4368733	G	A	intergenic	LSM3-ENSCAFG00000037118			intergenic	LSM3-LOC102152894
chr20	4386933	T	C	intergenic	LSM3-ENSCAFG00000037118			intergenic	LSM3-LOC102152894
chr20	4602013	G	A	intronic	SLC6A6			intronic	SLC6A6
chr20	4660723	C	T	intronic	GRIP2			intronic	GRIP2
chr20	5258875	G	A	intergenic	ENSCAFG00000004589-U6			ncRNA_intronic	LOC111091214
chr20	5345969	C	T	intergenic	ENSCAFG00000004590-TMCC1			intergenic	LOC111091214-TMCC1
chr20	5461419	TTA	T	intronic	TMCC1			intronic	TMCC1
chr20	5461420	TA	*	intronic	TMCC1			intronic	TMCC1
chr20	5648046	C	T	exonic	IFT122	Non-synonymous SNV	ENSCAFT00000007816:c.3176G>A:p.R1059H	exonic	IFT122	Non-synonymous SNV	XM_533734.6:c.3176G>A:p.R1059H
chr20	5652394	GGGGGGGGGGGTGGGGGT	G	intronic	IFT122			intronic	IFT122
chr20	5652397	G	*,GGGGT	intronic	IFT122			intronic	IFT122
chr20	5652398	G	*	intronic	IFT122			intronic	IFT122
chr20	5652399	GGGGGGTGGGGGTGGGGGGTGGTC	*	intronic	IFT122			intronic	IFT122
chr20	5657213	C	T	exonic	IFT122	Synonymous SNV	ENSCAFT00000007816:c.2565G>A:p.E855E	exonic	IFT122	Synonymous SNV	XM_533734.6:c.2565G>A:p.E855E
chr20	5811382	G	A	exonic	CAND2	Synonymous SNV	ENSCAFT00000069378:c.27C>T:p.D9D	UTR5	TMEM40
chr20	5980954	C	T	intronic	MKRN2			intronic	MKRN2
chr20	5993511	GCC	G	intronic	MKRN2			intronic	MKRN2
chr20	5993512	C	*	intronic	MKRN2			intronic	MKRN2
chr20	6056291	C	T	intronic	PPARG			intronic	TSEN2
chr20	6077990	GACAC	G	intronic	PPARG			intronic	TSEN2
chr20	6099638	C	T	intronic	PPARG			intergenic	TSEN2-PPARG
chr20	6723128	AAAAG	A	intergenic	ENSCAFG00000042950-ENSCAFG00000049879			intergenic	TAMM41-VGLL4
chr20	6893132	G	A	intronic	VGLL4			intronic	VGLL4
chr20	7032463	TAGAC	T	intronic	ATG7			intronic	ATG7
chr20	7241961	TTCCTCCTCCTCCTCCTCCTCCTCCTCCTCCTCC	TTCC,T	intergenic	HRH1-SLC6A1			intergenic	HRH1-LOC102151123
chr20	7369010	A	G	intronic	SLC6A1			intronic	SLC6A1
chr20	7609174	TCCC	TCCCCC,T	intergenic	SLC6A11-ATP2B2			ncRNA_intronic	LOC111091426
chr20	7609188	T	A	intergenic	SLC6A11-ATP2B2			ncRNA_intronic	LOC111091426
chr20	7769469	GC	G	intronic	ATP2B2			intronic	ATP2B2
chr20	7769471	TC	T	intronic	ATP2B2			intronic	ATP2B2
chr20	7986466	T	TC	intronic	ATP2B2			intronic	ATP2B2
chr20	7986740	T	C	intronic	ATP2B2			intronic	ATP2B2
chr20	7990687	G	GGAAAGGAAAGGAAAGGGAAGGGAAGGAAAGGAAAGGA	intronic	ATP2B2			intronic	ATP2B2
chr20	8022492	A	T	intronic	ATP2B2			intronic	ATP2B2
chr20	8053071	G	A	intronic	SEC13			intronic	SEC13
chr20	8082931	A	C	intergenic	SEC13-GHRL			intergenic	SEC13-GHRL
chr20	8111069	T	A	intronic	ENSCAFG00000005131			intronic	TATDN2
chr20	8118782	A	T	intronic	ENSCAFG00000005131			intronic	TATDN2
chr20	8233425	T	G	intergenic	BRK1-FANCD2OS			intergenic	BRK1-FANCD2OS
chr20	8670866	C	T	intergenic	LHFPL4-SETD5			intergenic	LHFPL4-SETD5
chr20	8781857	A	C	intronic	THUMPD3			intronic	THUMPD3
chr20	8824566	G	A	intergenic	THUMPD3-SRGAP3			intergenic	THUMPD3-SRGAP3

## Sheet: MEI
Chromosome	Position start (bp)	Position end (bp)	Type	Length (bp)	REF	ALT	Function Ensembl	Gene Ensembl	Function NCBI	Gene NCBI
20	8125965	8126144	SINEC	179	T	<INS:ME:SINEC>	intronic	ENSCAFG00000005131	intronic	TATDN2

## Sheet: SV
ID	Chromosome start	Position start (bp)	REF	ALT	Chromosome end	Position end (bp)	SVTYPE	CT	Function Ensembl	Gene Ensembl	Function NCBI	Gene NCBI
BND00668743	chr5	18879429	G	]chr20:8125977]G	chr20	8125977	BND	5to3	intronic	ENSCAFG00000005131	intronic	TATDN2
